# Supplementary material for: Customizing the spatial distribution and release of silver for the antibacterial actionviabiomineralized self-assembling silver-loaded hydroxyapatite
Source: Royal Society of Chemistry journal article supplement (doi:10.1039/d2ma00291d), 2022-01-01
Supplement: d2ma00291d1.pdf [file d2ma00291d1.pdf]

## Supplementary material

### Customizing Spatial Distribution and Release of Silver for Antibacterial by Biomineralized Self-assembling Silver-loaded Hydroxyapatite

Yunping Qiao<sup>a</sup>, Guangqing Mai<sup>a</sup>, Yujing Li<sup>a</sup>, Rengui Guan<sup>a</sup>, Yanyang Han<sup>a</sup>, Wei Cui<sup>a</sup>,  
Xinglong Wang<sup>a</sup>, Shiliang Liu<sup>b</sup>, Shanshan Liu<sup>a\*</sup>, Tao He<sup>a\*</sup>

<sup>a</sup>*College of Chemistry and Chemical Engineering, Yantai University, Yantai 264005,  
China*

<sup>b</sup>*Weifang Branch Company, Shandong HI-speed Transportation Construction Group  
Co., Ltd, Qingzhou, 262500, China*

\*Corresponding authors.

E-mail address: liushanshan@ytu.edu.cn(Shanshan Liu), ytuht@ytu.edu.cn(Tao He)

1. Preparation details
2. FT-IR samples
3. XRD step-by-step
4. Ag-HA prepared by co-precipitation method
5. Silver ions release
6. Inhibition zone experiment

## **1. Preparation of silver-loaded hydroxyapatite antibacterial nanoparticles**

### **1.1 *Staphylococcus aureus* culture**

The traditional microbial experiment technology was applied for *Staphylococcus aureus* culture. The sterile Luria nutrient broth (Contains 0.5wt% NaCl, 1 wt% Tryptone, 0.3wt% beef extract, pH 7.4) was used as the bacterial culture medium at 37 °C, constant speed 140 rpm/min and continue shaking culture for 24 h. Then 1 L of the above-mentioned *Staphylococcus aureus* (~10<sup>9</sup> CFU/mL) culture solution was centrifuged at 4500r/min for 10 min, and then resuspend it in 50 mL of phosphate buffered saline (PBS) buffer. Finally, the bacteria pellets were rinsed with sterilized deionized water and centrifuged, and dispersed in 20 mL of deionized water to obtain a high concentration of *Staphylococcus aureus* solution.

## 1.2 Biomineralized assembling silver-loaded hydroxyapatite layer-by-layer

**Table S1. Reagents added in each step of preparation of Ag-HA-HA, HA-Ag-HA and HA-HA-Ag particles**

| Step  | Ag-HA-HA sample                                                                                                                   | HA-Ag-HA sample                                                                                                                              | HA-HA-Ag sample                                                                                                                               |
|-------|-----------------------------------------------------------------------------------------------------------------------------------|----------------------------------------------------------------------------------------------------------------------------------------------|-----------------------------------------------------------------------------------------------------------------------------------------------|
| Step1 | <p><b>S<sub>1</sub> solution</b></p> <p>AgNO<sub>3</sub> (10mL, 0.01g/mL)</p> <p><i>S.aureus</i>(20mL,~10<sup>9</sup> CFU/mL)</p> | <p><b>S<sub>1</sub>' solution</b></p> <p>Ca(NO<sub>3</sub>)<sub>2</sub>(10mL 0.225 M)</p> <p><i>S.aureus</i>(20mL,~10<sup>9</sup>CFU/mL)</p> | <p><b>S<sub>1</sub>'' solution</b></p> <p>Ca(NO<sub>3</sub>)<sub>2</sub>(10mL 0.225 M)</p> <p><i>S.aureus</i>(20mL,~10<sup>9</sup>CFU/mL)</p> |
| Step2 | <p><b>S<sub>2</sub> solution</b></p> <p>Na<sub>2</sub>HPO<sub>4</sub> (80 mL, PH=12)</p> <p>+S<sub>1</sub></p>                    | <p><b>S<sub>2</sub>' solution</b></p> <p>Na<sub>2</sub>HPO<sub>4</sub>(80 mL, PH=12)</p> <p>+S<sub>1</sub>'</p>                              | <p><b>S<sub>2</sub>'' solution</b></p> <p>Na<sub>2</sub>HPO<sub>4</sub>(80 mL, PH=12)</p> <p>+S<sub>1</sub>''</p>                             |
| Step3 | <p><b>S<sub>3</sub> solution</b></p> <p>Ca(NO<sub>3</sub>)<sub>2</sub>(10mL 0.225 M)+S<sub>2</sub></p>                            | <p><b>S<sub>3</sub>' solution</b></p> <p>AgNO<sub>3</sub> (10mL, 0.01g/mL)+S<sub>2</sub>'</p>                                                | <p><b>S<sub>3</sub>'' solution</b></p> <p>Ca(NO<sub>3</sub>)<sub>2</sub>(10mL 0.225 M)+S<sub>2</sub>''</p>                                    |
| Step4 | <p><b>S<sub>4</sub> solution</b></p>                                                                                              | <p><b>S<sub>4</sub>' solution</b></p>                                                                                                        | <p><b>S<sub>4</sub>'' solution</b></p>                                                                                                        |

|              |                                                                                                      |                                                                                                         |                                                                                            |
|--------------|------------------------------------------------------------------------------------------------------|---------------------------------------------------------------------------------------------------------|--------------------------------------------------------------------------------------------|
|              | Na <sub>2</sub> HPO <sub>4</sub> (10 mL, PH=12)<br>+S <sub>3</sub>                                   | Na <sub>2</sub> HPO <sub>4</sub> (10 mL, PH=12)<br>+S <sub>3</sub> '                                    | Na <sub>2</sub> HPO <sub>4</sub> (10 mL, PH=12)<br>+S <sub>3</sub> ''                      |
| <b>Step5</b> | <b>S<sub>5</sub> solution</b><br>Ca(NO <sub>3</sub> ) <sub>2</sub> (10mL 0.225 M)<br>+S <sub>4</sub> | <b>S<sub>5</sub>' solution</b><br>Ca(NO <sub>3</sub> ) <sub>2</sub> (10mL 0.225 M)<br>+S <sub>4</sub> ' | <b>S<sub>5</sub>'' solution</b><br>AgNO <sub>3</sub> (10mL, 0.01g/mL)<br>S <sub>4</sub> '' |
| <b>Step6</b> | Washing, Dispersion, Heating<br>and drying                                                           | Washing, Dispersion, Heating<br>and drying                                                              | Washing, Dispersion, Heating<br>and drying                                                 |

## 2. FT-IR samples

The cultured *Saphylococcus aureus*, S1 and S1' suspension were centrifuged, washed with water for three times, and the precipitate was freeze-dried to obtain powder and was compressed to tablets with 0.16g potassium bromide.

## 3. XRD step-by-step

The solutions in Step 2 (S<sub>2</sub>, S<sub>2</sub>', S<sub>2</sub>'')→Step 3(S<sub>3</sub>, S<sub>3</sub>', S<sub>3</sub>'')→Step 4(S<sub>4</sub>, S<sub>4</sub>', S<sub>4</sub>'')→Step 5(S<sub>5</sub>, S<sub>5</sub>', S<sub>5</sub>'') are centrifuged, washed by ethanol and dried to obtain the corresponding powder samples, which are characterized by XRD.

## 4. Ag-HA prepared by co-precipitation method

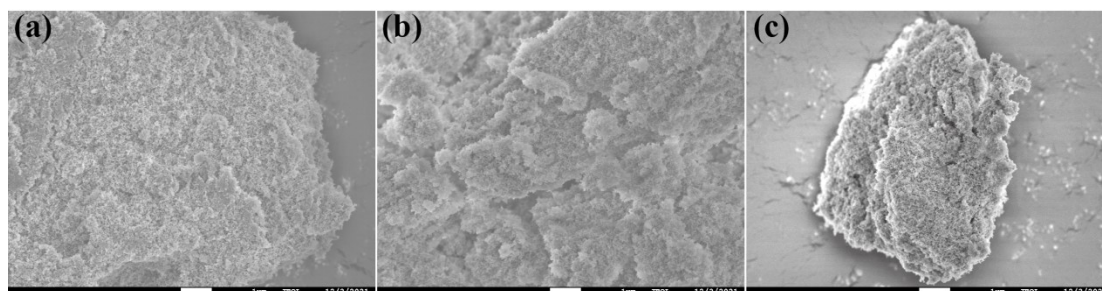

**Fig. S1.** SEM of Ag-HA prepared by co-precipitation method without *S.aureus*

templates: (a)Ag-HA-HA, (b)HA-Ag-HA, (c)HA-HA-Ag

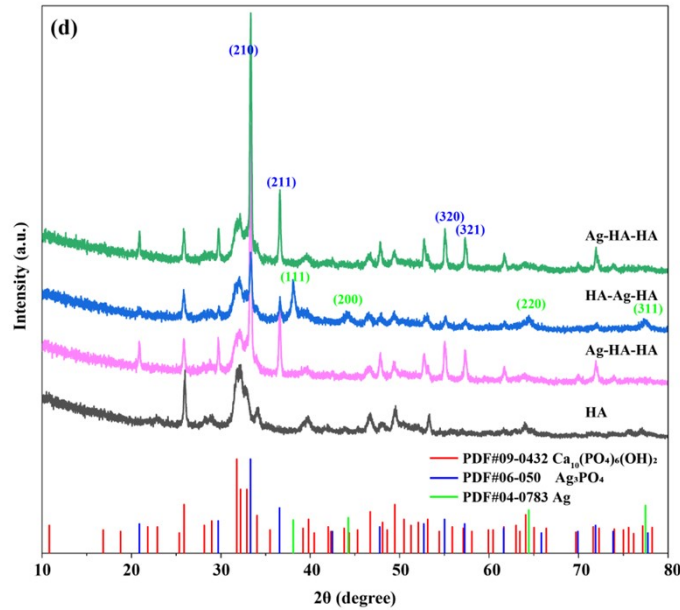

Fig. S2. XRD patterns of Ag-HA prepared by co-precipitation method without *S.aureus*

templates: (a)Ag-HA-HA, (b)HA-Ag-HA, (c)HA-HA-Ag

XRD patterns of Ag-HA prepared through the preparation procedure of experimental section without *S. aureus* templates shows that all the three samples contain  $\text{AgPO}_4$  and HA phase with excellent crystallinity. That's because the ions cannot be anchored without *S.aureus* templates and  $\text{PO}_4^{3-}$  ions in the solution are sufficient enough to react with both  $\text{Ca}^{2+}$  and  $\text{Ag}^+$  ions.  $\text{AgPO}_4$  and HA can nucleate and crystallize independently. Specially, for HA-Ag-HA prepared without *S. aureus* templates, other than  $\text{AgPO}_4$  and HA phase, there is still elemental Ag because  $\text{Ag}^+$  tend to be reduced without anchoring effect of templates.

## 5. Silver ions release

### (1) $\text{Ag}^+$ concentration with different soaking times

The three particles (Ag-HA-HA, HA-Ag-HA, and HA-HA-Ag) with the same

mass were immersed in the same amount of deionized water. Every seven days, the solutions were centrifuged to collect the supernatant and the precipitation was immersed in the same amount of deionized water again. The concentration of  $\text{Ag}^+$  ions in the supernatant was tested by atomic absorption spectrometry.

## (2) $\text{Ag}^+$ concentration with duration

The three particles (Ag-HA-HA, HA-Ag-HA, and HA-HA-Ag) with the same mass were placed in the same amount of deionized water. The same amount of supernatant was collected every seven days, in which the concentration of  $\text{Ag}^+$  ions in the supernatant was tested by atomic absorption spectrometry.

## 6. Inhibition zone experiment

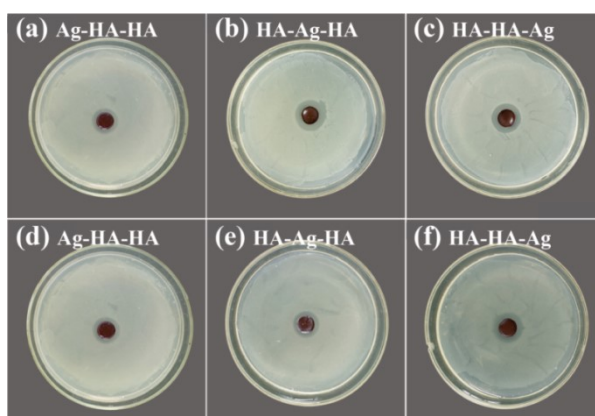

**Fig. S3. Bacteriostatic zone test of silver-loaded hydroxyapatite antibacterial agents: *S. aureus* ((a),(b),(c)) and *Escherichia coli* ((d),(e),(f)).**
